# Supplementary material for: Cell-type-specific PtrWOX4a and PtrVCS2 form a regulatory nexus with a histone modification system for stem cambium development in Populus trichocarpa
Source: Springer Nature journal article supplement (doi:10.1038/s41477-022-01315-7), 2023-01-09
Supplement: MOESM1 [file 41477_2022_1315_MOESM1_ESM.pdf]

# Cell-type-specific PtrWOX4a and PtrVCS2 form a regulatory nexus with a histone modification system for stem cambium development in *Populus trichocarpa*

---

In the format provided by the  
authors and unedited

## Supplementary Text

This supplementary text contains additional descriptive and explanatory information that could not be included in the main text due to space limitations.

### 1. Identification of vascular cambium-specific transcription factors in *P. trichocarpa*

We used laser capture microdissection (LCM) to isolate developing cambium (C), differentiating xylem (X), and developing phloem (P) cells from the stem of *P. trichocarpa* (Fig. 1a,b and Methods) for full transcriptome RNA-seq analysis (Methods). We thus identified 95 “vascular cambium-specific” (VCS) transcription factor (TF) genes from the overlap between 199 TFs whose developing cambium/developing phloem (C/P) transcript abundance ratio was greater than 2 (FDR < 0.05) and 143 TFs whose developing cambium/differentiating xylem (C/X) transcript abundance ratio was greater than 2 (FDR < 0.05). These 95 genes belong to 30 TF families (Supplementary Table 1) and several of their orthologs in other species have been suggested or demonstrated to play roles in regulating cambium activity<sup>1-5</sup>. We named these TF genes *PtrVCS1* to *PtrVCS95* (Supplementary Table 1) based on decreasing transcript levels in the vascular cambium. *PtrVCS1* (Potri.014G025300) is identical to *PtrWOX4a*<sup>6</sup>, and is the *P. trichocarpa* ortholog of the *WUSCHEL-RELATED HOMEODOMAIN4* (*WOX4*) that plays crucial roles in the maintenance of the vascular cambium in *Arabidopsis*<sup>1,7,8</sup> and *Populus*<sup>6</sup>. *PtrVCS2* (Potri.004G126600), the gene with the second most abundant transcripts, is not related to *PtrVCS1* and encodes a putative zinc finger (ZF) protein that belongs to a putative TF subfamily<sup>9-11</sup> of zinc finger-homeodomain (ZF-HD) proteins<sup>12</sup>. *In situ* mRNA hybridization validated the

tissue specificity of *PtrWOX4a* and *PtrVCS2* in cambium cells (Supplementary Fig. 1 and Fig. 3d). Additionally, we compared the expression profiles obtained for *VCS* genes and the high-spatial-resolution transcriptome profiles of the secondary phloem, vascular cambium, and wood-forming tissues of *P. tremula*<sup>13</sup>. Among 1,869 *VCS* genes, 88% of their homologs in *P. tremula* (1,637 out of 1,869; Supplemental Fig. 2a), including 82 *VCS* TF genes (Supplemental Fig. 2b), were highly expressed in *P. tremula* cambium samples<sup>13</sup>. We also compared the cambium-specific expression profiles to the transcriptome profiles of the shoot tip, young leaf, and primary root tissues for *P. trichocarpa*<sup>14</sup> and determined that 45 *VCS* TF genes (Supplemental Fig. 2c) are specifically expressed in the cambium, including *PtrVCS1* (*PtrWOX4a*) and *PtrVCS2*. In this study, we focused on the two most abundant *VCS* TF genes, *PtrWOX4a* and *PtrVCS2*.

## **2. Phenotype of *OE-PtrVCS2* transgenics and *ptrvcs2/ptrvcs2-h* double mutants**

Serial cross-section analysis of the stem from the 5<sup>th</sup> to the 20<sup>th</sup> internodes revealed that vascular cambium of *OE-PtrVCS2* and *OE-PtrVCS2-h* in all internodes examined is devoid of a fixed number (4 to 6) of cambium cell layers compared to the wild-type (WT) (Fig. 2c,d and Extended Data Fig. 1c,d,h-j). To exclude the possible effects of developmental age between the WT and the transgenic plants on secondary vascular growth, we compared the cambium phenotypes of internodes after the same growth or stem elongation period (30 days). The results showed that the number of cambium cell layers was significantly reduced in the *OE-PtrVCS2* (lines #2, #3) and *OE-*

46 *PtrVCS2-h* (lines #2, #3) transgenic lines compared to that in WT (Supplementary Fig.  
 47 3). In *Populus*, stem secondary growth (forming wood) normally starts from the 5<sup>th</sup>  
 48 internode<sup>15</sup>, when a continuous cylindrical vascular cambium is established<sup>16,17</sup>.  
 49 Overexpression of *PtrVCS2* or *PtrVCS2-h* induced an alteration in three vascular  
 50 developmental phases. First, in *OE-PtrVCS2* and *OE-PtrVCS2-h*, a cylindrical  
 51 vascular cambium had already begun to develop in the 1<sup>st</sup> internode (Supplementary  
 52 Fig. 4a,b). Second, differentiated or lignified secondary xylem was also already  
 53 established in the 1<sup>st</sup> internode (Supplementary Fig. 5a,b), which would normally take  
 54 place in the 6<sup>th</sup> internode in WT (Supplementary Fig. 5b). Third, the development of  
 55 secondary phloem became obvious in the 5<sup>th</sup> internode in *OE-PtrVCS2* and the 7<sup>th</sup>  
 56 internode in *OE-PtrVCS2-h* instead of the 12<sup>th</sup> internode in WT (Supplementary Fig.  
 57 5b).  
 58 We generated single and double knockout mutants (Fig. 2e,f and Extended Data Fig.  
 59 3a,d) in *PtrVCS2* and *PtrVCS2-h* in *P. trichocarpa* using a CRISPR-Cas9 genome-  
 60 editing system. We obtained two independent biallelic single mutants (*ptrvcs2* #1 and  
 61 *ptrvcs2* #2) and three independent biallelic double mutants (*ptrvcs2/ptrvcs2-h* #1,  
 62 *ptrvcs2/ptrvcs2-h* #2, and *ptrvcs2/ptrvcs2-h* #3) with insertions and/or deletions that  
 63 led to frame shifts and premature stop codons (Extended Data Fig. 3a,d). Growth and  
 64 stem cross-section analyses revealed that the single mutants and the WT exhibited  
 65 similar growth in plant height (Fig. 2e), stem diameter (Fig. 2f), proliferation in  
 66 cambium cells (Extended Data Fig. 3b,c), and secondary phloem and secondary  
 67 xylem development (Supplementary Fig. 6a). Although similar in height to WT plants,

*ptrvcs2/ptrvcs2-h* double mutants developed stem vascular features that were distinct from the WT and opposite to those of the overexpression lines (*OE-PtrVCS2* or *OE-PtrVCS2-h*). The double mutants had 2 to 4 more cambium cell layers as compared to the WT (the 5<sup>th</sup>-8<sup>th</sup> internodes in Fig. 2g,h and Extended Data Fig. 3e,f; the same age internodes [30 days old] in Supplementary Fig. 3), slightly delayed secondary phloem and secondary xylem developments (Supplementary Fig. 6b), and increased stem diameter (Supplementary Fig. 7). These phenotypes observed in the double mutants but not the single mutants confirmed the suggestion that *PtrVCS2* and *PtrVCS2-h* are functionally redundant.

### 3. RNA-seq analysis of *OE-PtrVCS2*

To investigate how *PtrVCS2* regulates cambium development, we performed RNA-seq analysis of cambium cells isolated from the WT and *OE-PtrVCS2* to identify differentially expressed genes (DEGs) in response to *PtrVCS2* overexpression (Supplementary Table 2 and Methods). We identified 13,266 DEGs (FDR < 0.05) consisting of 6,653 upregulated and 6,613 downregulated ones. For VCS TF genes, 39 of the 95 VCS TF genes (Supplementary Table 1) were also downregulated, whereas 18 of these 95 TF genes were upregulated. These results suggest that *PtrVCS2* may function more as a trans-repressor for vascular cambium development, particularly in the cell proliferation system.

### 4. ChIP-sequencing of *OE-PtrVCS2*

To investigate which genes are directly regulated by PtrVCS2, we determined the global binding sites of PtrVCS2 by ChIP-seq analysis. We cloned *PtrVCS2* in-frame with a 3×FLAG tag sequence and overexpressed the resulting construct in *P. trichocarpa* under the control of a CaMV 35S promoter and identified binding sites using an anti-FLAG antibody in ChIP assays. We selected transgenic line #3 (*OE-PtrVCS2-3×FLAG #3*) showing the highest transgene transcript levels for further analysis (Extended Data Fig. 4a,b). Like the *OE-PtrVCS2* transgenics (Fig. 2c,d and Extended Data Fig. 1c,d), the *OE-PtrVCS2-3×FLAG #3* line had fewer cambium cell layers (Extended Data Fig. 4c,d). We carried out ChIP-seq analysis of cambium tissues from the *OE-PtrVCS2-3×FLAG #3* transgenic line and sequenced six ChIP-seq libraries (ChIP-DNA and input DNA, three biological replicates per library). We obtained 30.4~32.95 million uniquely aligned reads per library (Supplementary Table 3). The sequencing depth after removing duplication reads was 2.99×~3.33×, showing 60%~63% genome coverage (Supplementary Table 3). Data quality assessment using the irreproducible discovery rate framework with a 1% threshold indicated that the three replicates are highly reproducible (Supplementary Fig. 8a-i). Input DNA libraries were used as a control for ChIP-seq peak calling. We used a model-based analysis for ChIP-seq<sup>18</sup> to identify peaks and obtained 6,790 peaks for PtrVCS2 ( $P < 1e-05$  and conserved in at least two independent biological replicates, Extended Data Fig. 4e and Supplementary Table 3). Genes that contained one or more binding sites within 3 kb of the upstream putative promoter region were defined as target genes. Based on these criteria, we identified 2,087 putative PtrVCS2 target genes.

112

## 113 **5. Protein-protein interaction motif feature of PtrVCS2**

114 Phylogenetic and sequence analyses indicated that *PtrVCS2* encodes a putative zinc  
115 finger (ZF) protein (Extended Data Fig. 2a and Supplementary Fig. 9), is a homolog  
116 of Arabidopsis *MINI ZINC FINGER (MIF)* genes<sup>12</sup>, and belongs to a subfamily of the  
117 zinc finger-homeodomain (ZF-HD) protein family<sup>11,12,19</sup>. The ZF-HD family members  
118 function in transcriptional regulation through the homeobox (HD) domain for DNA  
119 binding, and the zinc finger (ZF) domain for homo- and hetero-protein dimer  
120 formation<sup>19-22</sup>. *PtrVCS2* harbors such ZF domain but lacks the HD domain  
121 (Supplementary Fig. 9), so we speculated that it targets genes by interacting with  
122 other HD-bearing TFs that can directly bind to such targets.

## Supplementary Figures

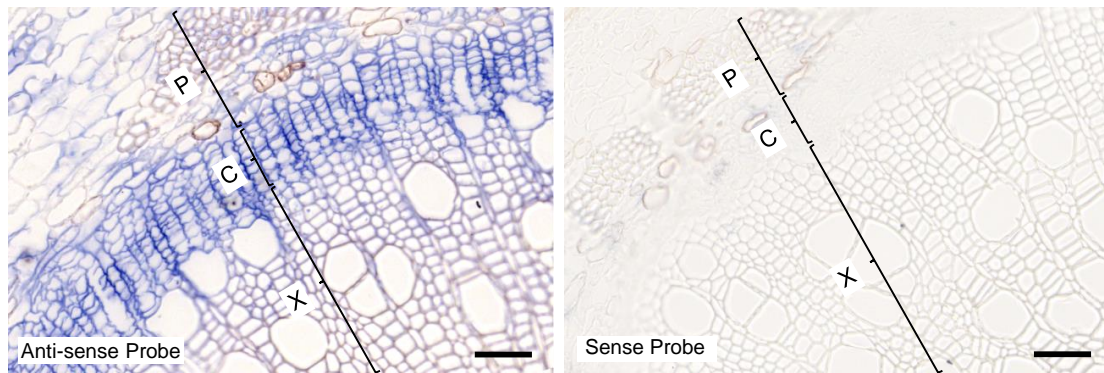

**Supplementary Fig. 1 *In situ* hybridization of *PtrVCS2* mRNA.** Hybridization with digoxigenin-labeled antisense RNA probes showed that *PtrVCS2* was preferentially expressed in the cambium zone. Paraffin sections are from the 6<sup>th</sup> internode of *P. trichocarpa* stems. Black brackets mark vascular cambium cells (C), phloem cells (P) and xylem cells (X). Scale bars, 50  $\mu$ m. The experiments were repeated independently three times with similar results.



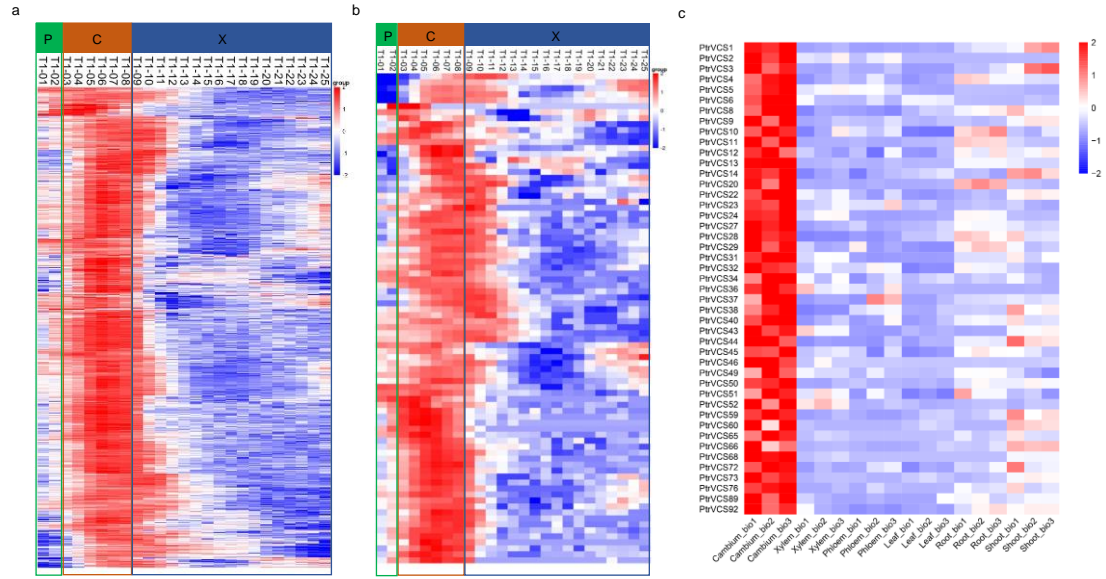

**Supplementary Fig. 2 Expression profiles of vascular cambium-specific genes. a** and **b**, Heat map showing the expression profiles of 1637 vascular cambium-specific (VCS) genes (**a**) and 82 VCS TF genes (**b**) across phloem (P), cambium (C) and xylem (X) tissues, based on the AspWood datasets<sup>13</sup> (<http://aspwood.popgenie.org>). **c**, Heat map showing the expression profiles of 45 VCS TF genes in cambium, xylem, and phloem cell types based on our LCM datasets and leaf, shoot (including shoot tips from the first to the third internode), and root tissues based on Shi's datasets<sup>14</sup>. In (**a**), (**b**), and (**c**), Expression values are scaled by row, with each row representing one gene. Expression values above the gene average are shown in red and below the average in blue, according to the color scale to the right of each heatmap.

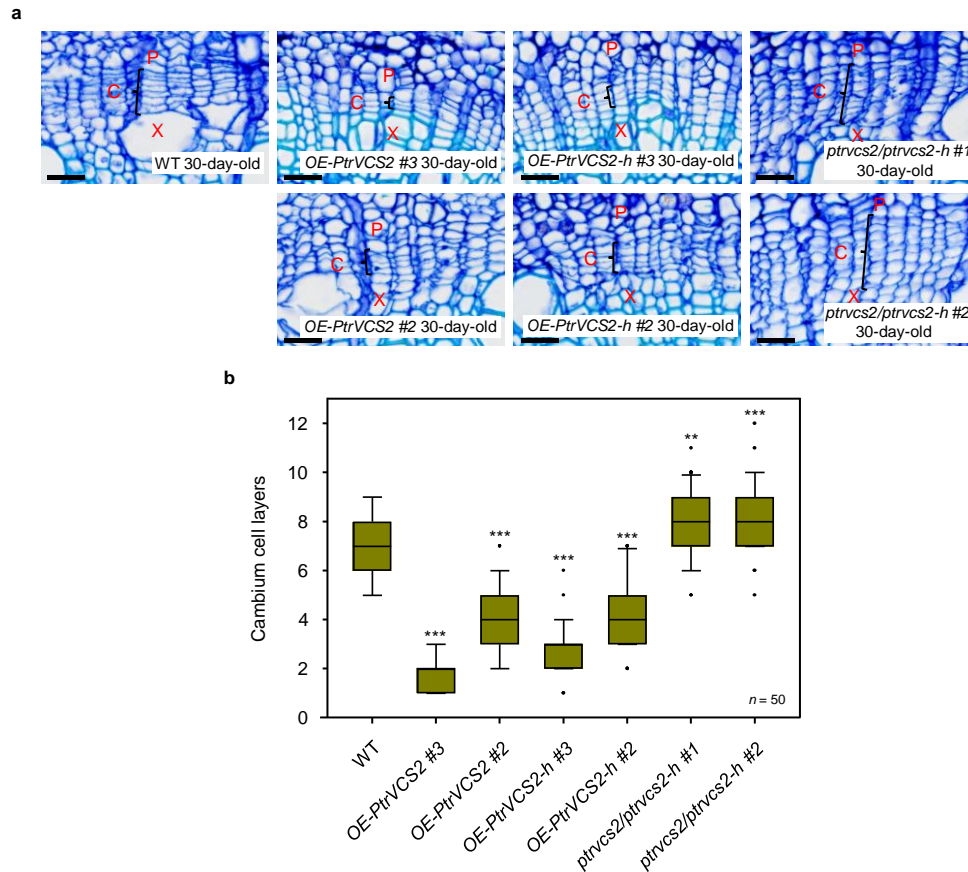

**Supplementary Fig. 3 Cambium phenotype analysis of same-age internodes (30-day-old internodes) from WT, *OE-PtrVCS2*, *OE-PtrVCS2-h* transgenics and *ptrvcs2/ptrvcs2-h* mutants.** **a**, Cross-sections of the same age internodes (30-day growth) from WT, *OE-PtrVCS2* #2, #3 transgenics, *OE-PtrVCS2-h* #2, #3 transgenics, and *ptrvcs2/ptrvcs2-h* #1, #2 mutants were stained with toluidine blue O. Black brackets mark the cambium cells in one radial cell file. Scale bars, 25  $\mu$ m. C, cambium; P, phloem; X, xylem. **b**, Number of cambium cell layers in stem vascular tissues of WT, *OE-PtrVCS2* #2, #3 transgenics, *OE-PtrVCS2-h* #2, #3 transgenics, and *ptrvcs2/ptrvcs2-h* #1, #2 mutants of the same age internodes (30-day growth). Cambium cell layer numbers of at least ten radial cell files were counted within one cross-section from each biological replicate. Three biological replicates were carried

154 out. n=50. Boxes show the median with the upper and lower quantiles, and the  
155 whiskers represent the data range excluding outliers. Two-tailed Student's *t*-test: \*\**P*  
156 < 0.01, \*\*\**P* < 0.001. *P* values versus WT control for *OE-PtrVCS2* #3 is <0.0001, for  
157 *OE-PtrVCS2* #2 is <0.0001, *OE-PtrVCS2-h* #3 is <0.0001, for *OE-PtrVCS2-h* #2 is  
158 <0.0001, for *ptrvcs2/ptrvcs2-h* #1 is 0.0089, for *ptrvcs2/ptrvcs2-h* #2 is <0.0001.

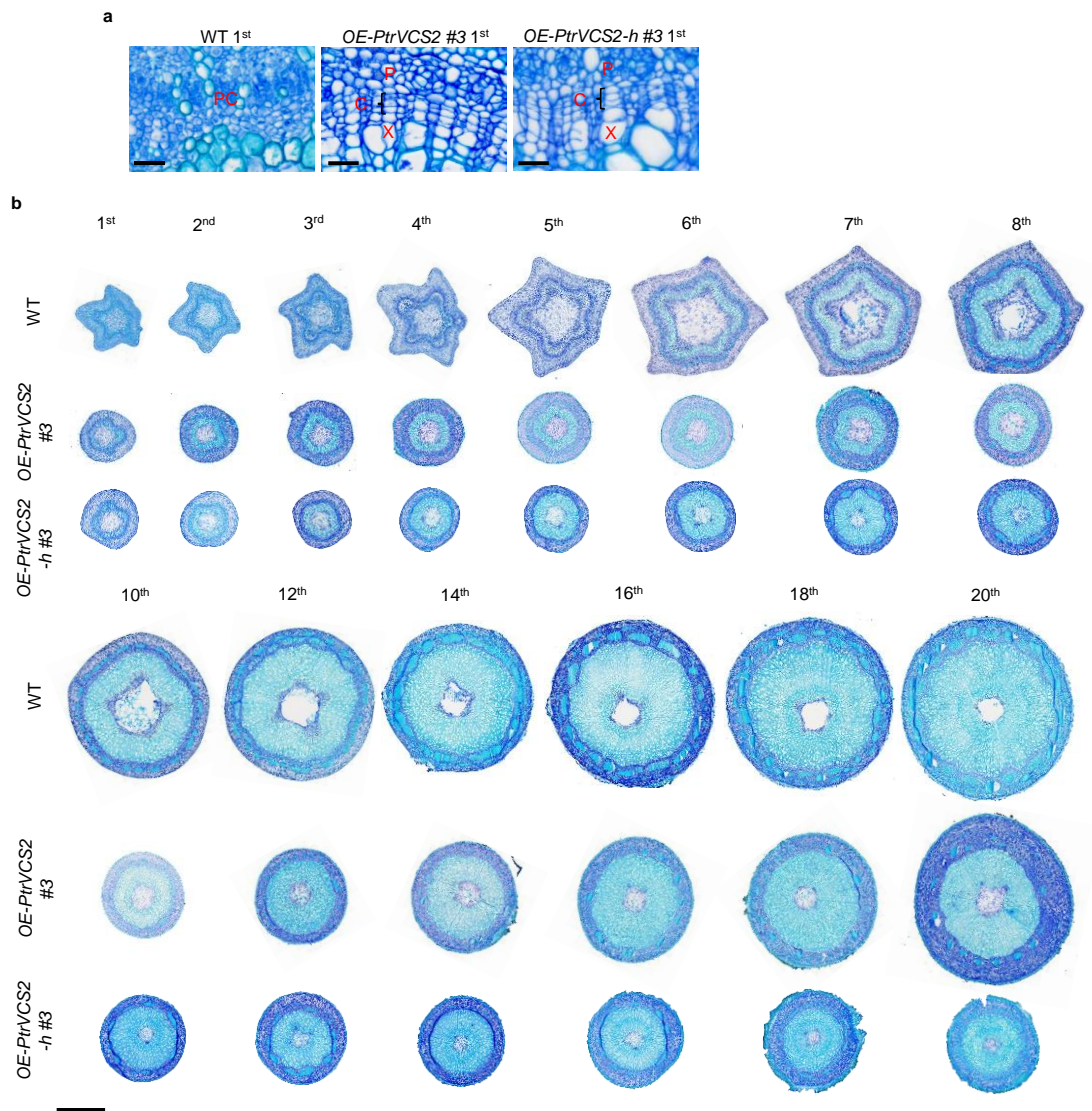

**Supplementary Fig. 4 Histochemistry and histological analysis of internodes from WT, *OE-PtrVCS2*, and *OE-PtrVCS2-h* transgenics stained with toluidine blue O.** Cross-sections of 14 internodes from the 1<sup>st</sup> (a) to the 20<sup>th</sup> (b) internodes of *P. trichocarpa* stems stained with toluidine blue O. Representative images from one biological replicate are shown, and the other two biological replicates were found with similar results. **a**, Black brackets mark the cambium cells in one radial cell file. Scale bars, 25 μm. PC, procambium; C, cambium; P, phloem; X, xylem. **b**, Scale bars,

167 1 mm.

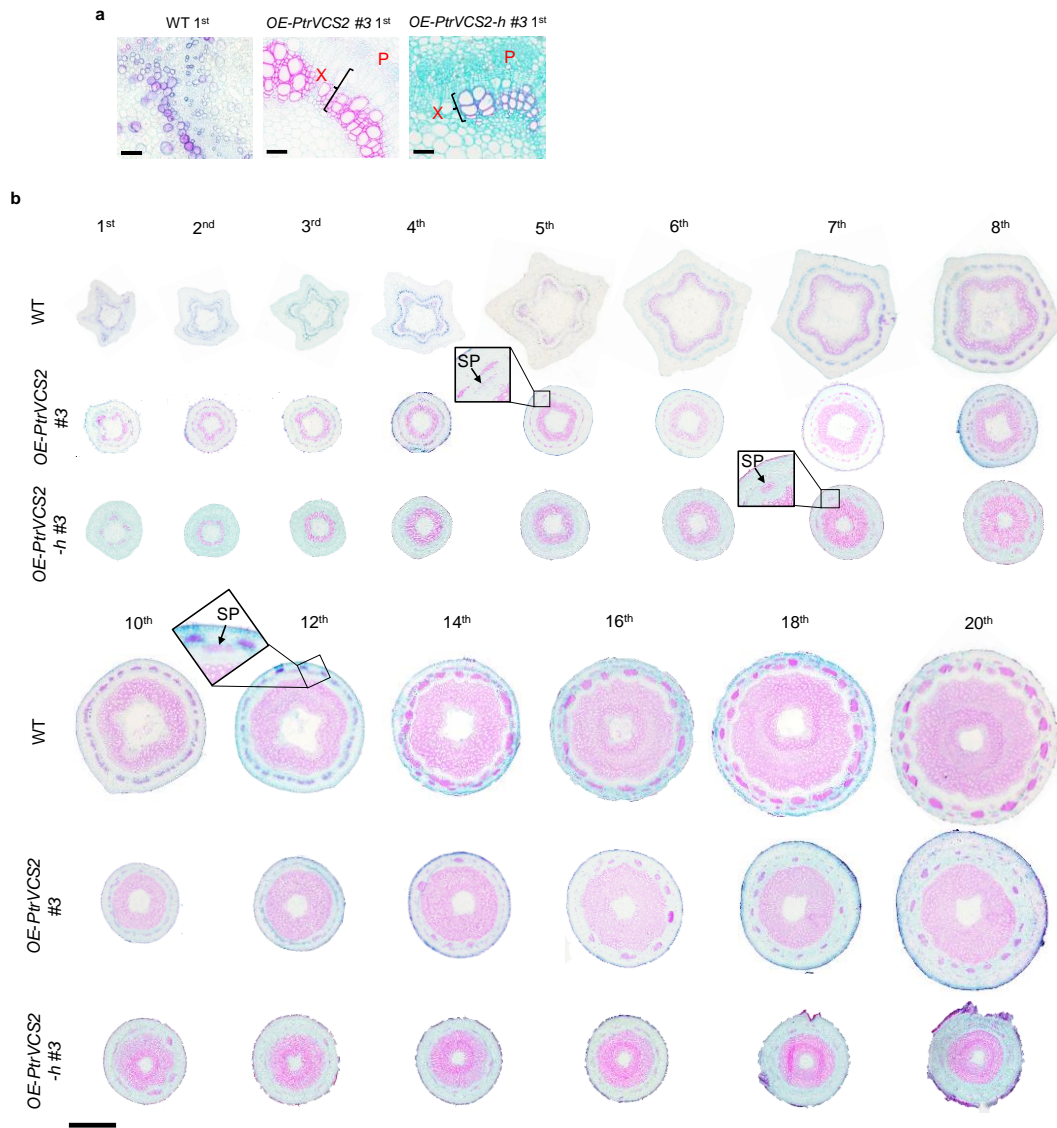

168

169 **Supplementary Fig. 5 Histochemistry and histological analysis of internodes**  
170 **from WT, *OE-PtrVCS2*, and *OE-PtrVCS2-h* transgenics stained with safranin O**  
171 **and fast green. Cross-sections of 14 internodes from the 1<sup>st</sup> (a) to the 20<sup>th</sup> (b) of *P.***  
172 ***trichocarpa* stems stained with safranin O and fast green. Representative images from**  
173 **one biological replicate are shown, and the other two biological replicates were found**  
174 **with similar results. a, Scale bars, 50 µm. X, xylem; P, phloem. b, Scale bars, 1 mm.**  
175 **SP, secondary phloem.**



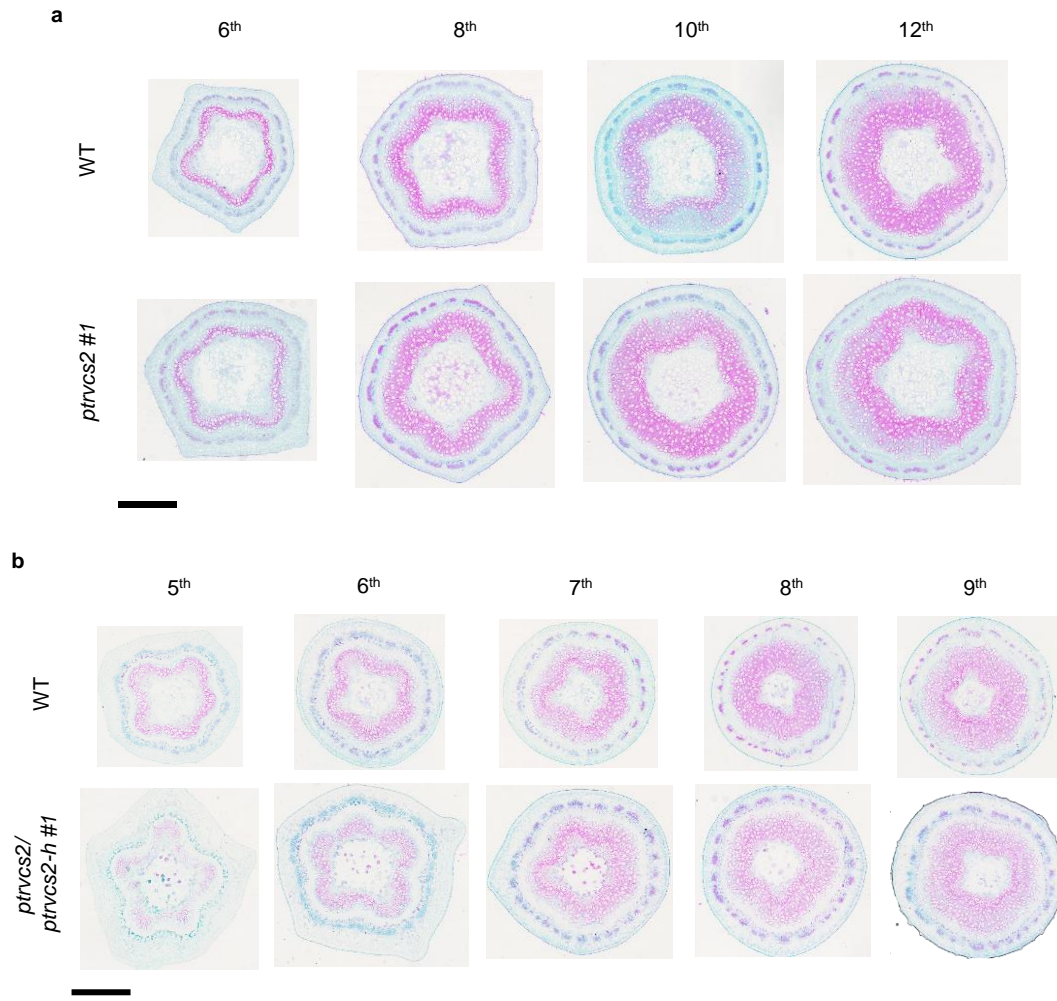

**Supplementary Fig. 6 Histochemistry and histological analysis of internodes**  
**from WT, the *ptrvcs2* single mutant (a) and the *ptrvcs2/ptrvcs2-h* double mutant**  
**(b).** Cross-sections were stained with safranin O and fast green. Scale bars, 1 mm.  
 Representative images from one biological replicate are shown, and the other two  
 biological replicates were found with similar results.

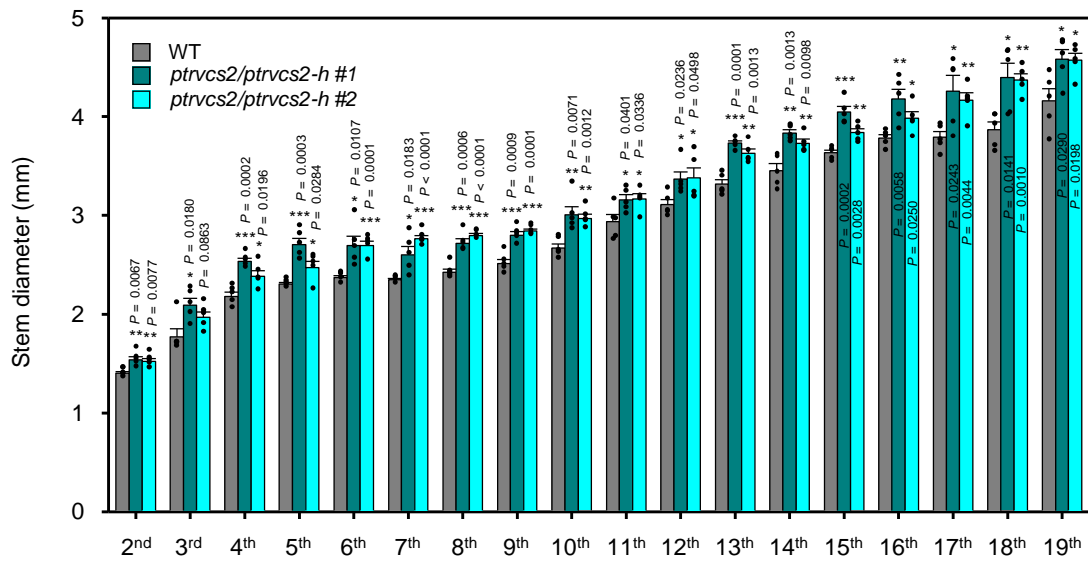

**Supplementary Fig. 7 Stem diameter of wild-type and *ptrvcs2/ptrvcs2-h* double mutant plants.** The data are shown as mean±s.e.m.;  $n = 5$  independent *P. trichocarpa* plants for each genotype. The asterisks indicate significant differences between the mutants and WT plants, as determined by two-tailed Student's *t*-test (\* $P < 0.05$ , \*\* $P < 0.01$ , \*\*\* $P < 0.001$ ).

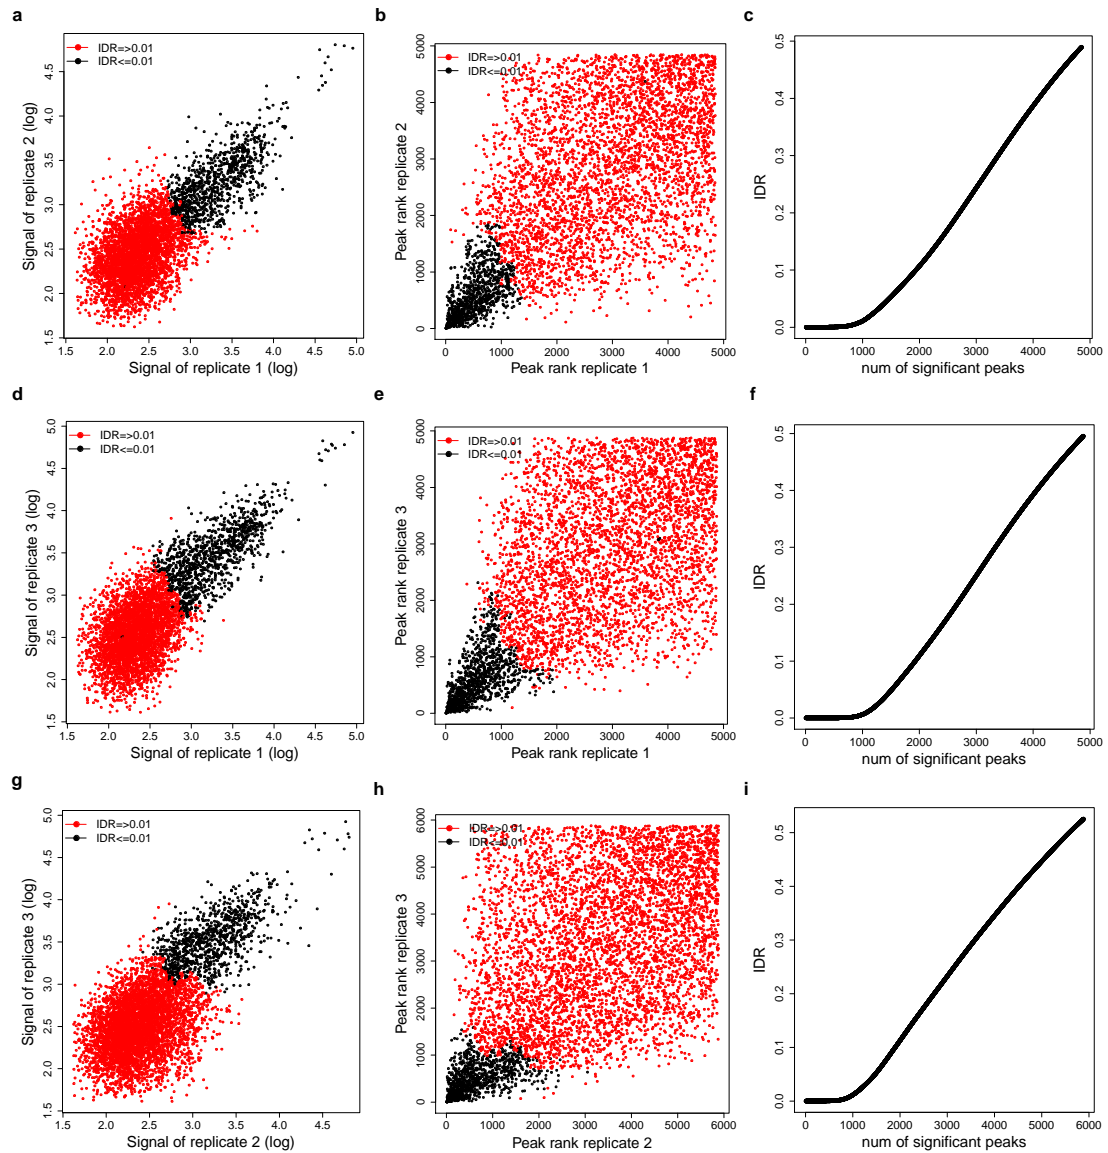

**Supplementary Fig. 8 Irreproducible discovery rate (IDR) framework for assessing the reproducibility of PtrVCS2 ChIP-seq data sets.** **a, d, g**, Scatter plots of signal scores of peaks that overlap in two replicates. **b, e, h**, Scatter plots of ranks of peaks that overlap in each pair of replicates. Note that low ranks correspond to high signal and vice versa. **c, f, i**, Estimated IDR as a function of different rank thresholds.



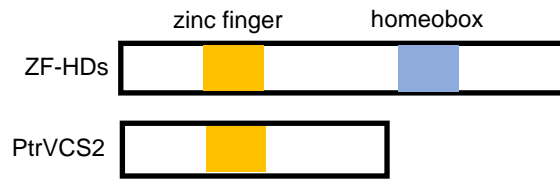

**Supplementary Fig. 9 Schematic diagram of the functional domain in classical *P. trichocarpa* ZF-HD family proteins and PtrVCS2.** PtrVCS2 has no homeobox domain, only the zinc finger domain.

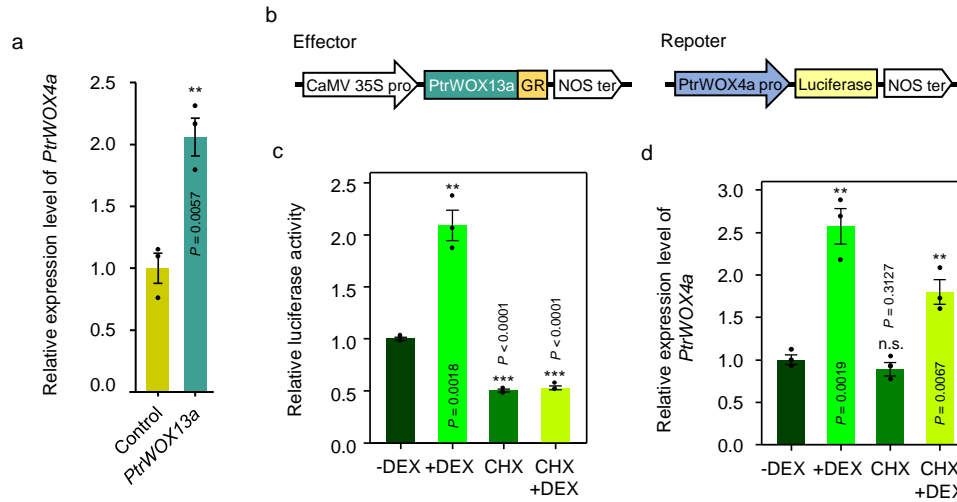

**Supplementary Fig. 10 *PtrWOX13a* directly regulates *PtrWOX4a* transcription. a,**

Relative expression levels of *PtrWOX4a* in *P. trichocarpa* stem xylem protoplasts

overexpressing *GFP* (Control) or *PtrWOX13a*. **b,** Schematic diagrams of the effector

and reporter constructs used in the glucocorticoid receptor-based inducible gene

expression assays<sup>23</sup>. **c,** Luciferase activities in *P. trichocarpa* stem xylem protoplasts

co-transfected with the effector and reporter constructs. Luciferase activity was

induced by adding dexamethasone (DEX) and was completely abolished by treating

with the protein synthesis inhibitor cycloheximide (CHX). **d,** Relative expression

levels of *PtrWOX4a* in *P. trichocarpa* stem xylem protoplasts expressing the effector

construct. The *PtrWOX4a* transcription was activated by DEX even in the presence of

CHX, indicating that *PtrWOX13a* directly regulates the *PtrWOX4a* expression. In **(a)**,

**(c)**, and **(d)**, control samples (no DEX) were set to 1. The data are shown as

mean $\pm$ s.e.m.;  $n = 3$  biological replicates (three independent batches of stem xylem

protoplasts transfections; Two-tailed Student's *t*-test: \*\* $P < 0.01$ , \*\*\* $P < 0.001$ ; n.s.,

no significant difference).

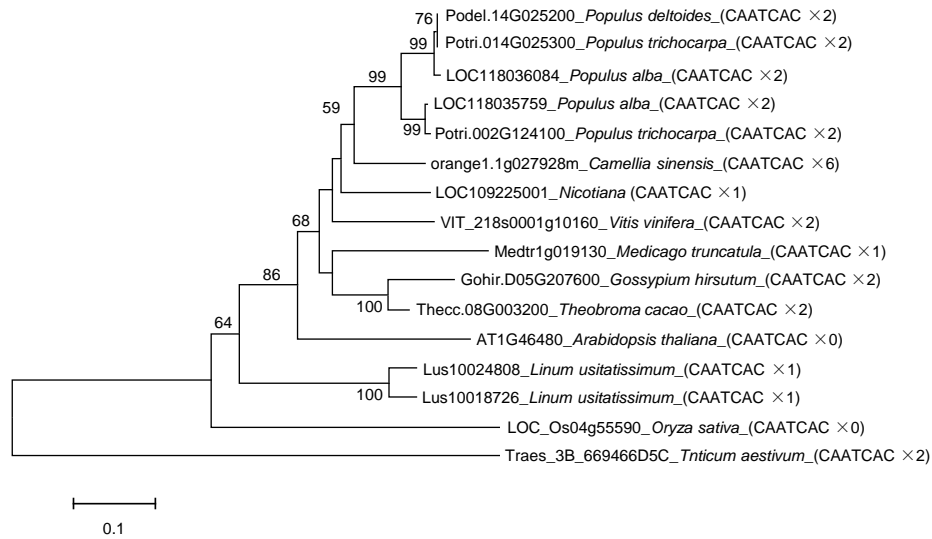

**Supplementary Fig. 11 Phylogenetic tree of WOX4 proteins from 13 species.** The number of the CAATCAC motif in the 3-kb promoter region of *WOX4* genes is shown in the panel. The phylogenetic tree was constructed using MEGA 5 with the neighbor-joining method and 1000 bootstrap replicates. Bar, 0.1 changes per amino acid position.

## Supplementary Information References

1. Zhang, J. et al. Transcriptional regulatory framework for vascular cambium development in *Arabidopsis* roots. *Nat. Plants* **5**, 1033-1042 (2019).
2. Zhu, Y., Song, D., Sun, J., Wang, X. & Li, L. PtrHB7, a class III HD-Zip gene, plays a critical role in regulation of vascular cambium differentiation in *Populus*. *Mol. Plant* **6**, 1331-1343 (2013).
3. Zhu, Y., Song, D., Xu, P., Sun, J. & Li, L. A HD-ZIP III Gene, PtrHB4, Is Required for Interfascicular Cambium Development in *Populus*. *Plant Biotechnol. J.* **16**, 808-817 (2018).
4. Robischon, M., Du, J., Miura, E. & Groover, A. The *Populus* class III HD ZIP, popREVOLUTA, influences cambium initiation and patterning of woody stems. *Plant Physiol.* **155**, 1214-1225 (2011).
5. Smit, M. E. et al. A PXY-Mediated Transcriptional Network Integrates Signaling Mechanisms to Control Vascular Development in *Arabidopsis*. *Plant Cell* **32**, 319-335 (2020).
6. Kucukoglu, M., Nilsson, J., Zheng, B., Chaabouni, S. & Nilsson, O. WUSCHEL-RELATED HOMEODOMAIN4 (WOX4)-like genes regulate cambial cell division activity and secondary growth in *Populus* trees. *New Phytol.* **215**, 642-657 (2017).
7. Hirakawa, Y., Kondo, Y. & Fukuda, H. TDIF peptide signaling regulates vascular stem cell proliferation via the WOX4 homeobox gene in *Arabidopsis*. *Plant Cell* **22**, 2618-2629 (2010).
8. Suer, S., Agusti, J., Sanchez, P., Schwarz, M. & Greb, T. WOX4 imparts auxin responsiveness to cambium cells in *Arabidopsis*. *Plant Cell* **23**, 3247-3259 (2011).

- 243 9. Mackay, J. P. & Crossley, M. Zinc fingers are sticking together. *Trends Biochem.*  
244 *Sci.* **23**, 1-4 (1998).
- 245 10. Takatsuji, H. Zinc-finger proteins: the classical zinc finger emerges in  
246 contemporary plant science. *Plant Mol. Biol.* **39**, 1073-1078 (1999).
- 247 11. Liu, M. et al. Genome-wide investigation of the ZF-HD gene family in Tartary  
248 buckwheat (*Fagopyrum tataricum*). *BMC Plant Biol.* **19**, 248 (2019).
- 249 12. Hu, W. & Ma, H. Characterization of a novel putative zinc finger gene MIF1:  
250 involvement in multiple hormonal regulation of *Arabidopsis* development. *Plant J.*  
251 **45**, 399-422 (2006).
- 252 13. Sundell, D. et al. AspWood: High-spatial-resolution transcriptome profiles reveal  
253 uncharacterized modularity of wood formation in *Populus tremula*. *Plant Cell* **29**,  
254 1585-1604 (2017).
- 255 14. Shi, R. et al. Tissue and cell-type co-expression networks of transcription factors  
256 and wood component genes in *Populus trichocarpa*. *Planta* **245**, 927-938 (2017).
- 257 15. Li, L. et al. The last step of syringyl monolignol biosynthesis in angiosperm dicots  
258 is regulated by a novel gene encoding sinapyl alcohol dehydrogenase. *Plant Cell*  
259 **13**, 1567-1586 (2001).
- 260 16. Esau, K. Vascular Differentiation in Plants (New York: Holt, Rinehart and  
261 Winston, 1965).
- 262 17. Evert, R. F. & Eichhorn, S. E. Esau's Plant Anatomy: Meristems, Cells, and  
263 Tissues of the Plant Body: Their Structure, Function, and Development, Ed 3  
264 (Hoboken, NJ: John Wiley & Sons, 2006).
- 265 18. Zhang, Y. et al. Model-based analysis of ChIP-Seq (MACS). *Genome Biol.* **9**,

- 266 R137 (2008).
- 267 19. Hu, W., dePamphilis, C. W & Ma, H. Phylogenetic analysis of the plant-specific  
268 zinc finger-homeobox and mini zinc finger gene families. *J. Integr. Plant Biol.* **50**,  
269 1031-1045 (2008).
- 270 20. Windhövel, A., Hein, I., Dabrowa, R. & Stockhaus, J. Characterization of a novel  
271 class of plant homeodomain proteins that bind to the C4 phosphoenolpyruvate  
272 carboxylase gene of *Flaveria trinervia*. *Plant Mol. Biol.* **45**, 201-214 (2001).
- 273 21. Park, H. C. et al. Pathogen-induced binding of the soybean zinc finger  
274 homeodomain proteins GmZF-HD1 and GmZF-HD2 to two repeats of ATTA  
275 homeodomain binding site in the calmodulin isoform 4 (GmCaM4) promoter.  
276 *Nucleic acids res.* **35**, 3612-3623 (2007).
- 277 22. Perrella, G. et al. ZINC-FINGER interactions mediate transcriptional regulation of  
278 hypocotyl growth in *Arabidopsis*. *Proc. Natl. Acad. Sci. USA.* **115**, E4503-E4511  
279 (2018).
- 280 23. Aoyama, T. & Chua, N.H. A glucocorticoid-mediated transcriptional induction  
281 system in transgenic plants. *Plant J.* **11**, 605-612 (1997)
